# Supplementary material for: Molecular Structure, Spectral Analysis, Molecular Docking and Physicochemical Studies of 3-Bromo-2-hydroxypyridine Monomer and Dimer as Bromodomain Inhibitors
Source: MDPI journal article supplement (doi:10.3390/molecules28062669), 2023-03-15
Supplement: s1 [file s1]

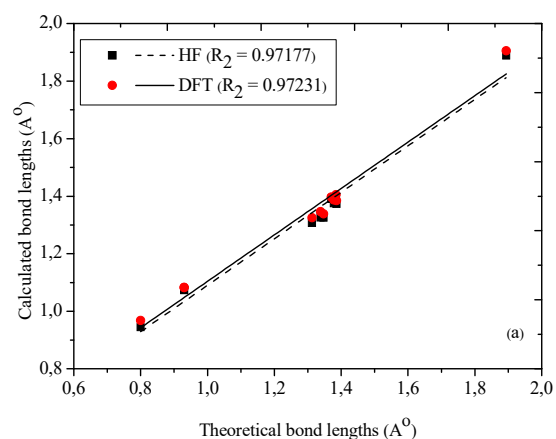

(a)

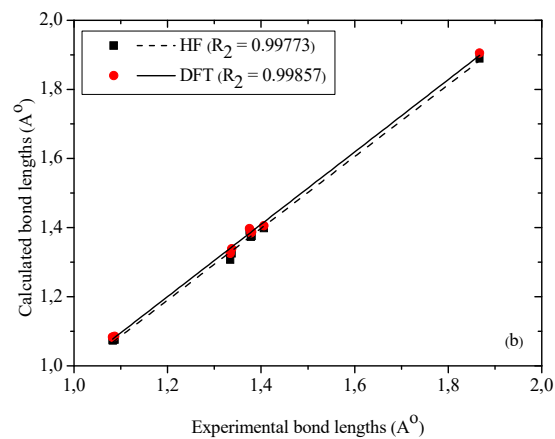

(b)

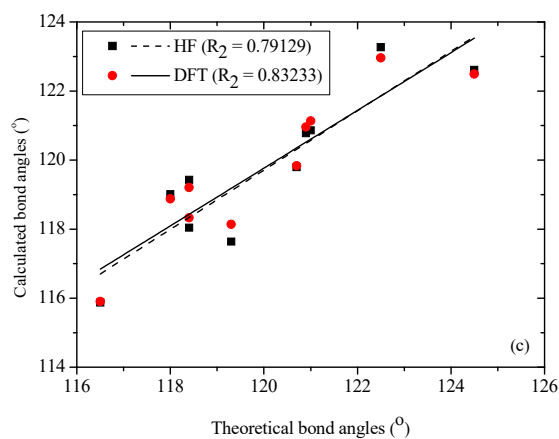

(c)

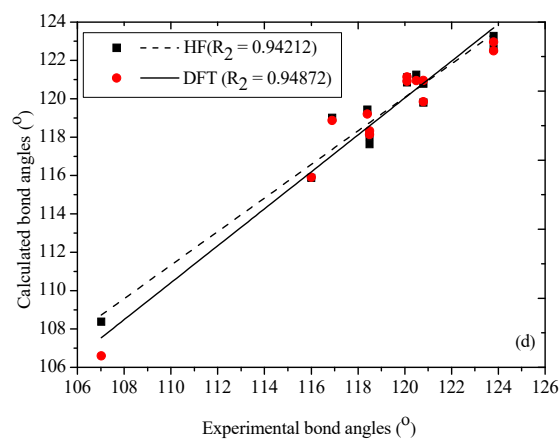

(d)

**Figure S1.** Correlation graphic between the calculated and ((a) and (b) theoretical and experimental bond lengths (c), and ((d) theoretical and experimental bond angles).

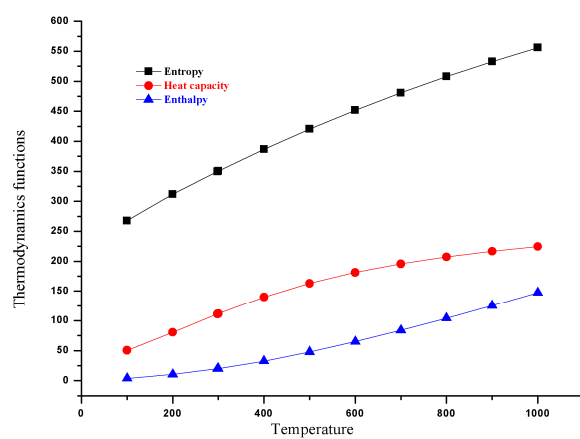

**Figure S2.** Variation of entropy (S), heat capacity (Cp) and enthalpy (H) with temperature for the 3-Br-2-HPy molecule.

**Table S1.** Calculated SCF energy, ZPVE, rotational constants, thermodynamic parameters and dipole moment (D) of 3-Br-2-HyP monomer and dimer structures with DFT method.

|                                                                      | <b>Monomer</b> | <b>Dimer</b>  |
|----------------------------------------------------------------------|----------------|---------------|
| <b>SCF energy E(kJ/mol)</b>                                          | -7606473.060   | -15213012.632 |
| <b>ZPVE (kcal/mol)</b>                                               | 52.10659       | 104.91781     |
| <b>Rotational constants (GHz)</b>                                    |                |               |
| <b>A</b>                                                             | 2.97625        | 0.71148       |
| <b>B</b>                                                             | 0.98182        | 0.11026       |
| <b>C</b>                                                             | 0.73827        | 0.09547       |
| <b>Thermal energy (kcal/mol)</b>                                     | 56.262         | 114.086       |
| <b>Specific heat at constant</b>                                     |                |               |
| <b>Volume <math>C_v</math> (cal.mol<sup>-1</sup>.K<sup>-1</sup>)</b> | 24.598         | 52.683        |
| <b>Entropy S (cal.mol<sup>-1</sup>.K<sup>-1</sup>)</b>               | 83.583         | 128.527       |
| <b>Dipole moment (Debye)</b>                                         | 2.1152         | 0.0019        |
